# Supplementary material for: Photoluminescence enhancement of Eu3+ ions by Ag species in SiO2 three-dimensionally ordered macroporous materials
Source: Royal Society of Chemistry journal article supplement (doi:10.1039/c5tc01340b), 2015-01-01
Supplement: c5tc01340b1.pdf [file c5tc01340b1.pdf]

Supporting information

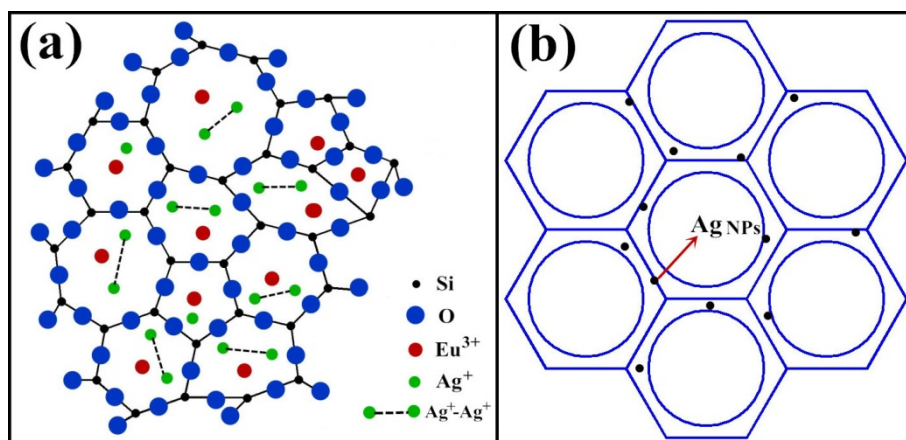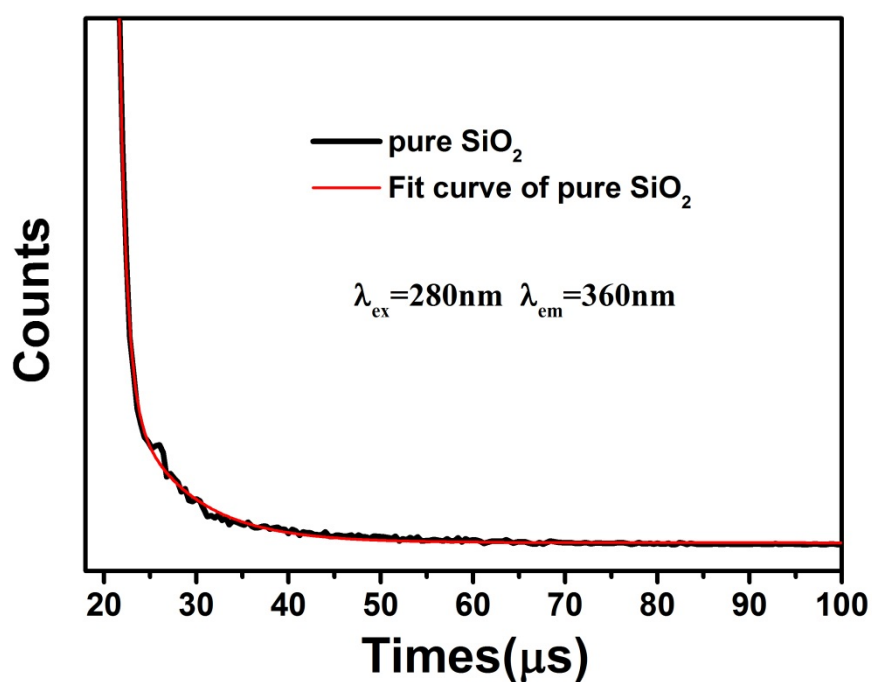

Fig. 1 The decay and fitting curves of 360 nm emissions of the pure  $\text{SiO}_2$  3DOM sample under the 280 nm excitation.

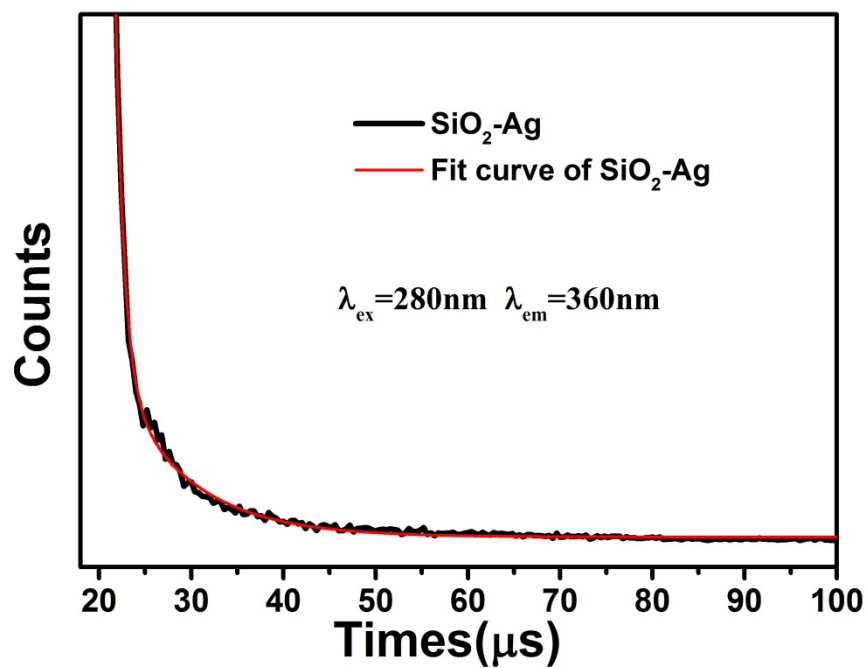

Fig. 2 The decay and fitting curves of 360 nm emissions of the SiO<sub>2</sub>-Eu 3DOM sample under the 280 nm excitation.

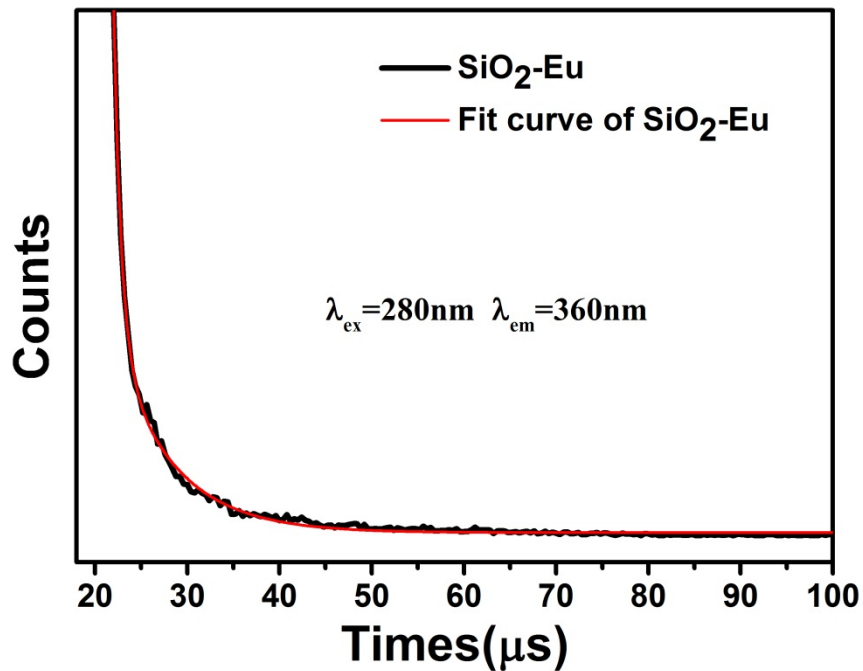

Fig. 3 The decay and fitting curves of 360 nm emissions of the SiO<sub>2</sub>-Ag 3DOM sample under the 280 nm excitation.

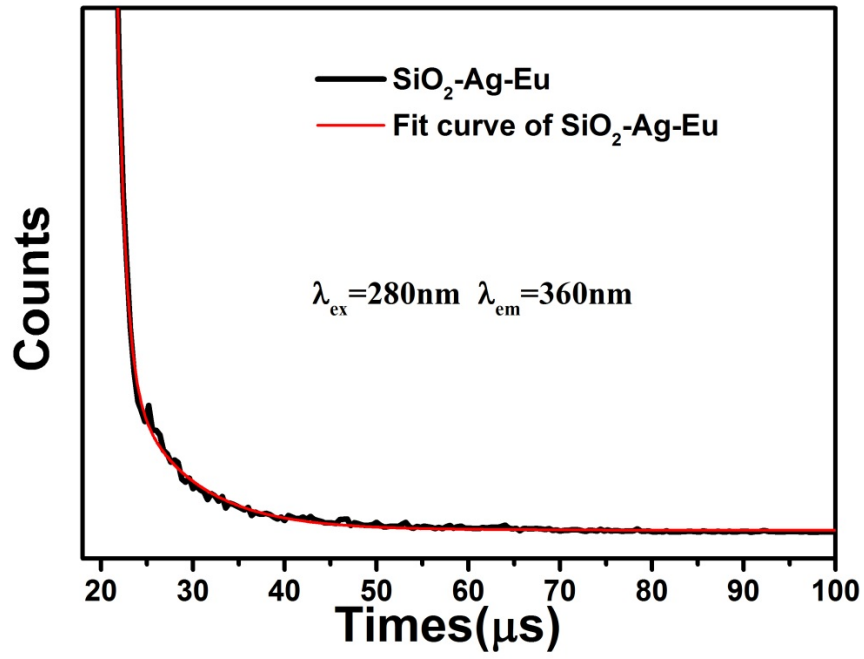

Fig. 4 The decay and fitting curves of 360 nm emissions in the SiO<sub>2</sub>-Ag-Eu 3DOM sample under the 280 nm excitation.

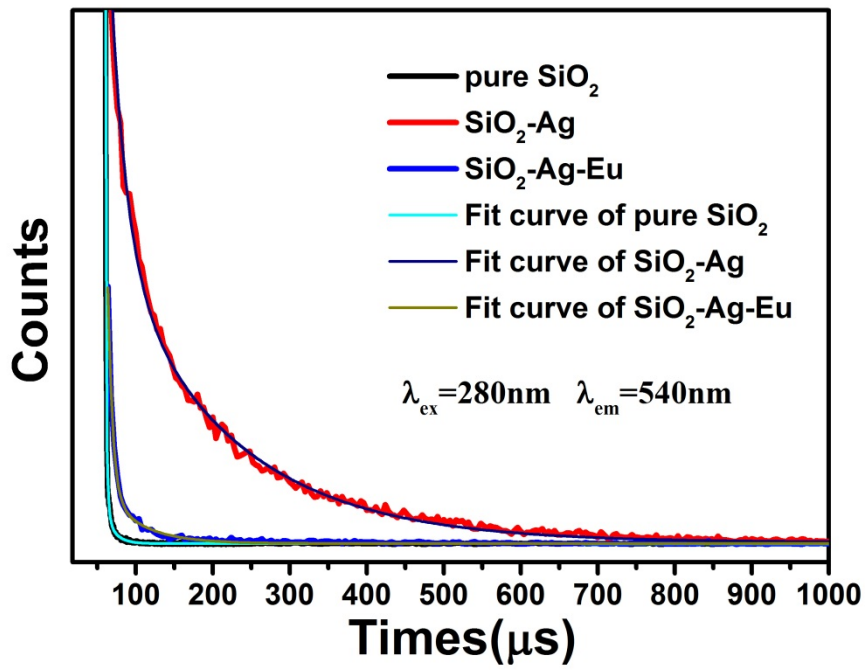

Fig.5 The decay and fitting curves of 540 nm emissions in the pure SiO<sub>2</sub>, SiO<sub>2</sub>-Ag and SiO<sub>2</sub>-Ag-Eu 3DOM samples under the 280 nm excitation.
